# Supplementary material for: Composition Analysis by UPLC-PDA-ESI (−)-HRMS and Antioxidant Activity Using Saccharomyces cerevisiae Model of Herbal Teas and Green Teas from Hainan
Source: PubMed Central journal article supplement (PMC6222971; doi:10.3390/molecules23102550), 2018-10-06
Supplement: molecules-23-02550-s001.pdf [file molecules-23-02550-s001.pdf]

# Composition Analysis By *UPLC-PDA-ESI (-)* *-HRMS* and Antioxidant Activity using *Saccharomyces cerevisiae* Model of Herbal Teas and Green Teas from Hainan

Hua Li, Lanying Wang and Yanping Luo\*

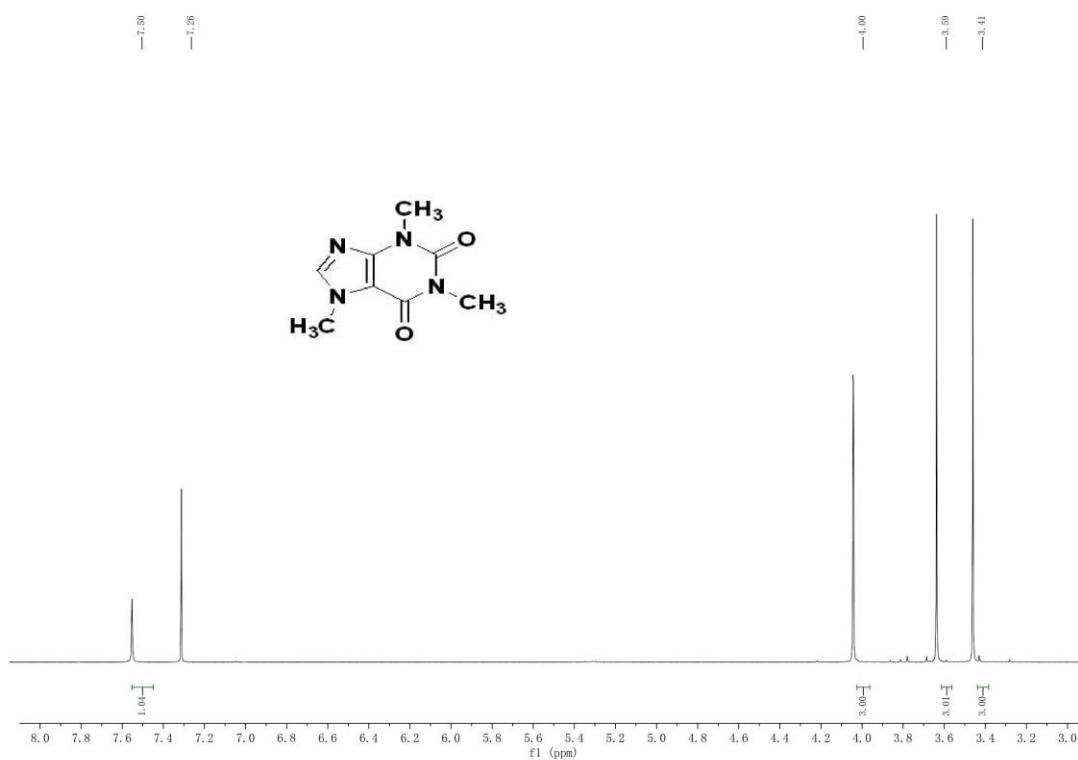

Figure S1. <sup>1</sup>H NMR spectra of caffeine isolated from DY

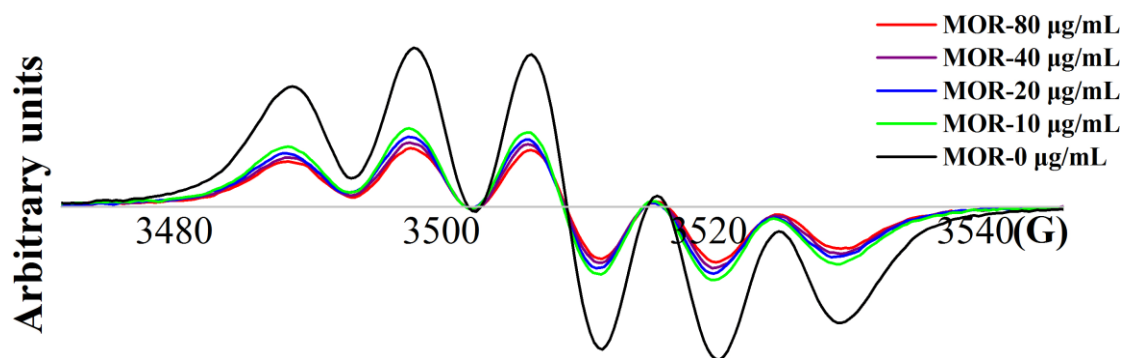

Figure S2. EPR signal strength of DPPH• at four concentrations of MO-Resin

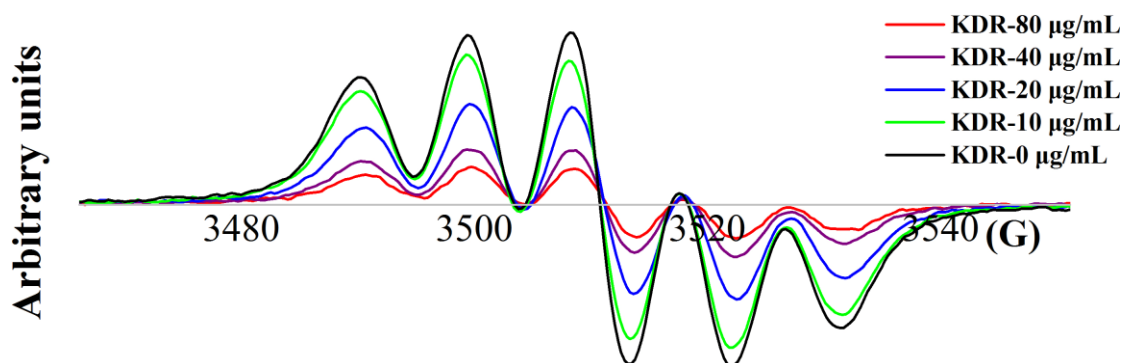

Figure S3. EPR signal strength of DPPH• at four concentrations of KD-Resin

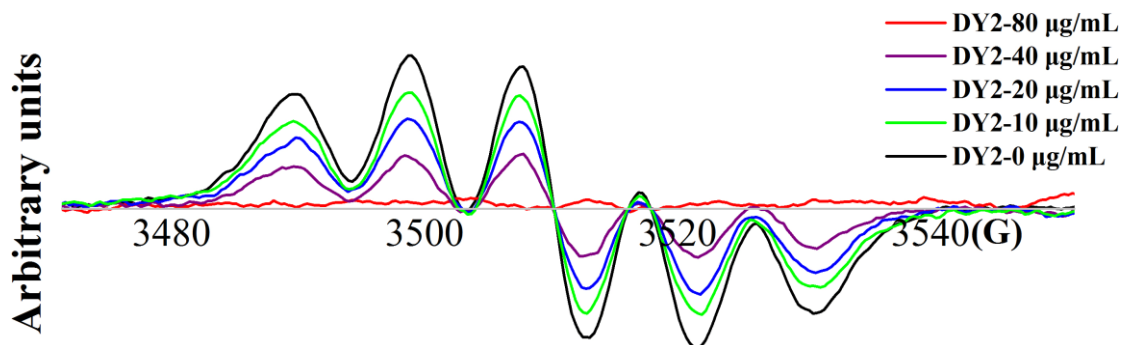

Figure S4. EPR signal strength of DPPH• at four concentrations of DY-Fraction II

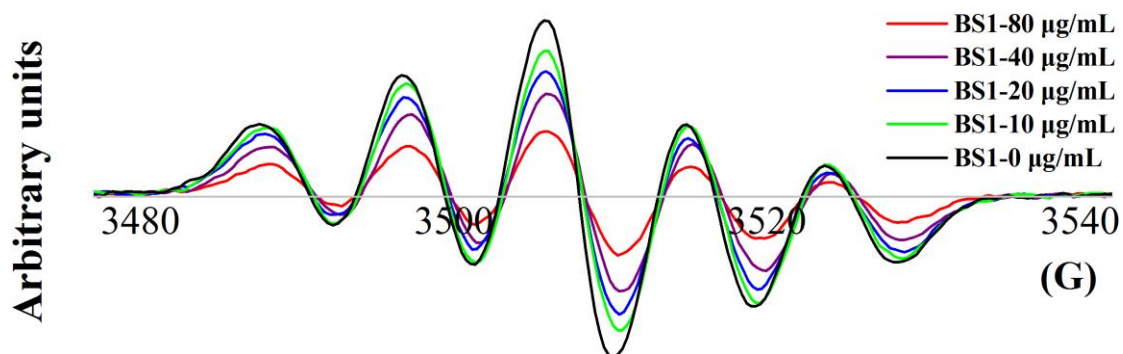

Figure S5. EPR signal strength of DPPH• at four concentrations of BS-Fraction I

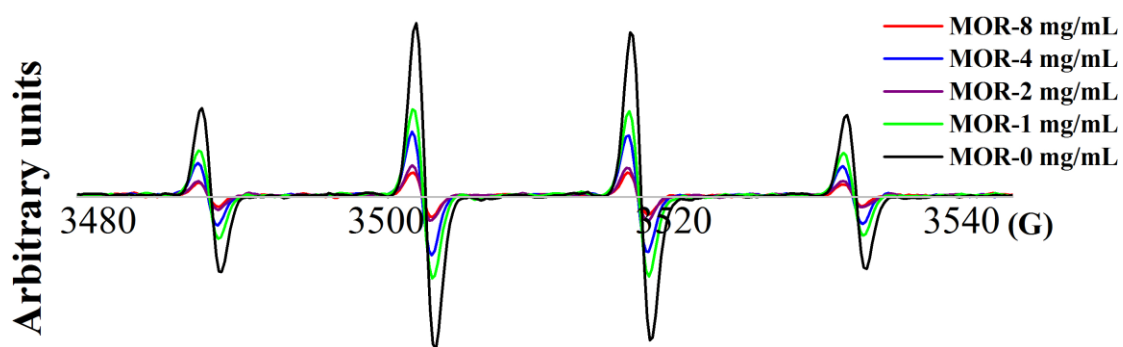

Figure S6. EPR signal strength of HO• at four concentrations of MO-Resin

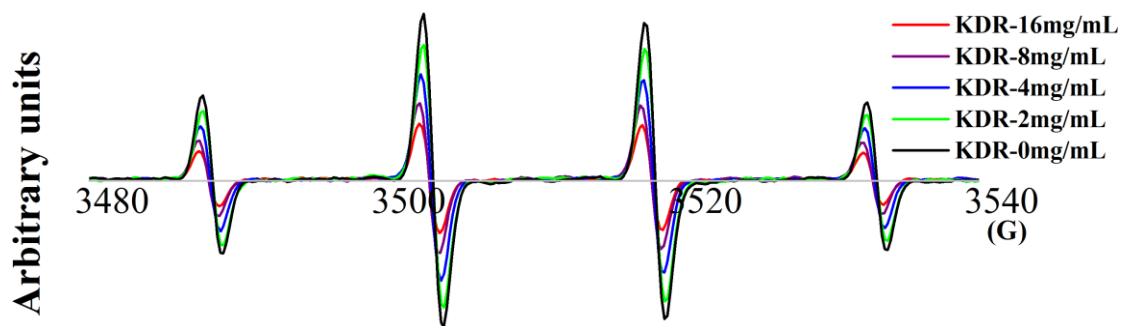

Figure S7. EPR signal strength of HO• at four concentrations of KD-Resin

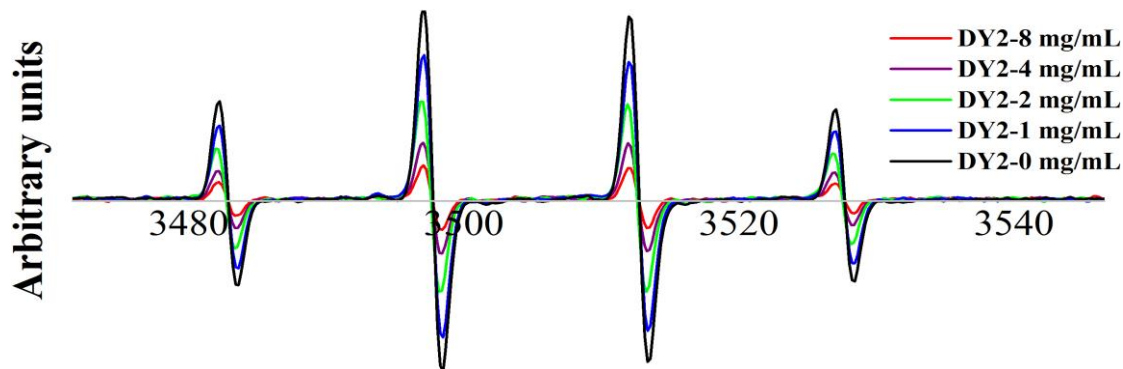

Figure S8. EPR signal strength of HO• at four concentrations of DY-Fraction II

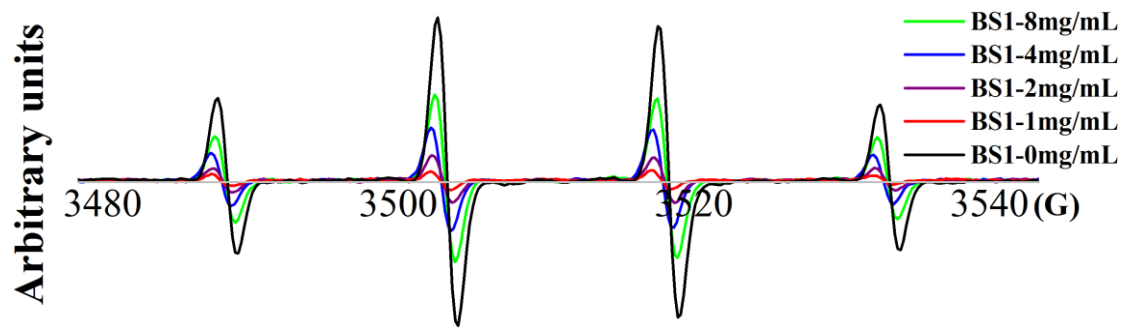

Figure S9. EPR signal strength of HO• at four concentrations of BS-Fraction I

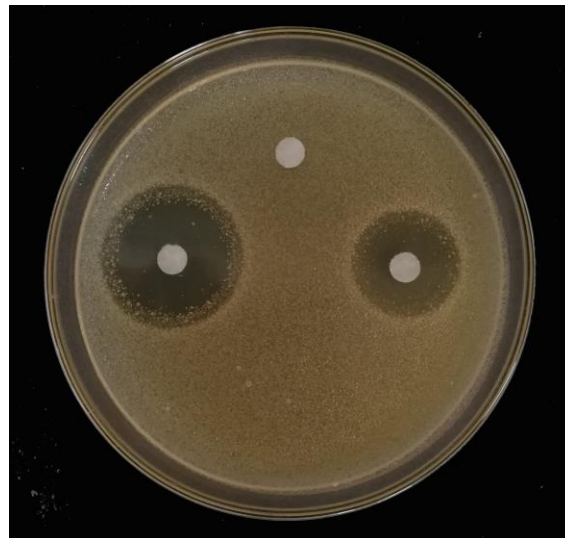

Figure S10. Halo assay of BS-fraction I on *sod1Δ* cells under H<sub>2</sub>O<sub>2</sub> stress

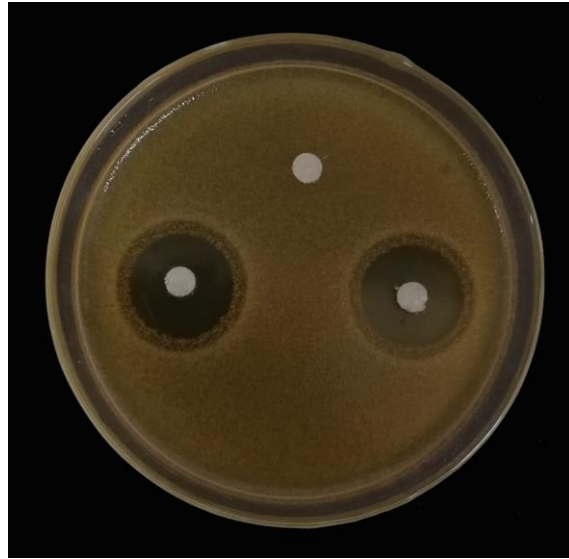

Figure S11. Halo assay of DMSO on *sod1Δ* cells under H<sub>2</sub>O<sub>2</sub> stress

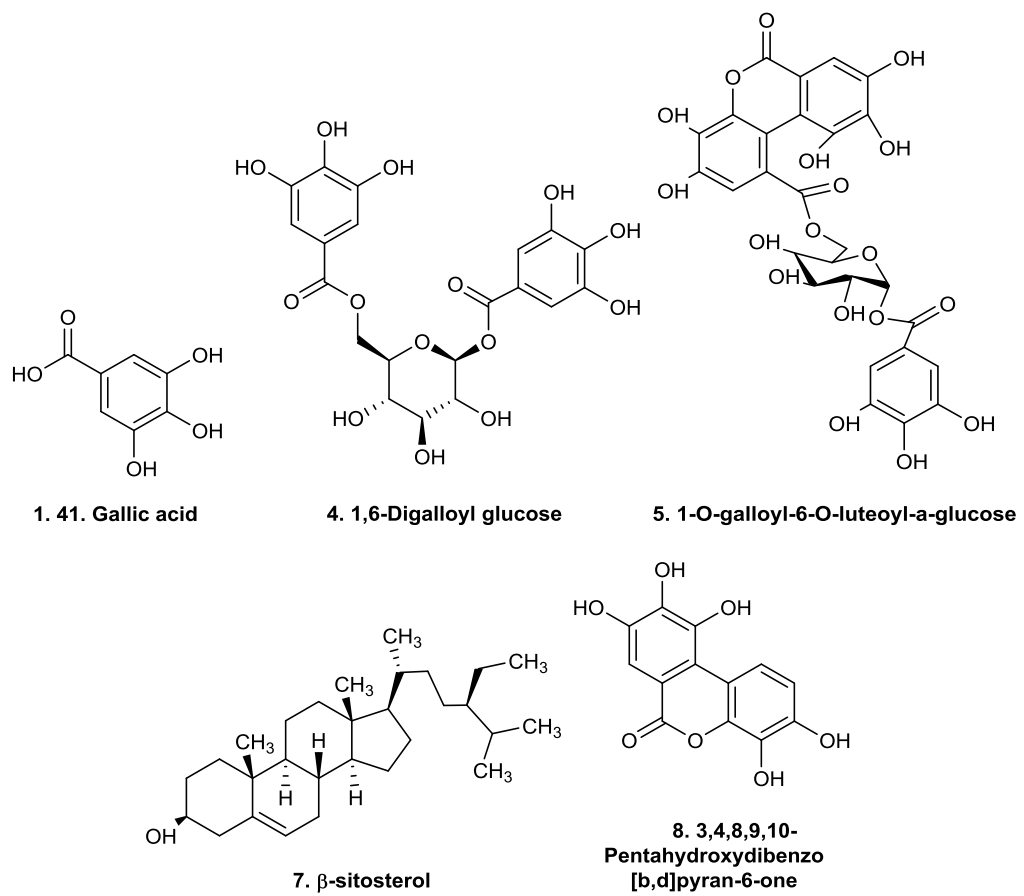

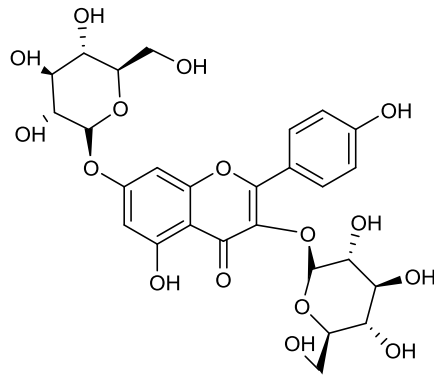

9. Kaempferol-3,7-di-O- $\beta$ -D-glucopyranoside

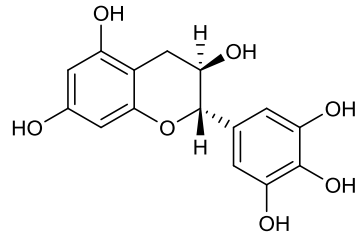

10. 42. 58. (-)-Gallocatechin (GC)

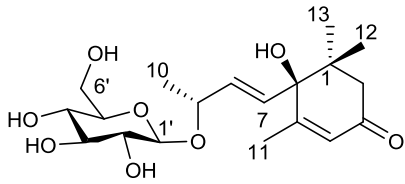

11. (6S,9R)-Roseoside

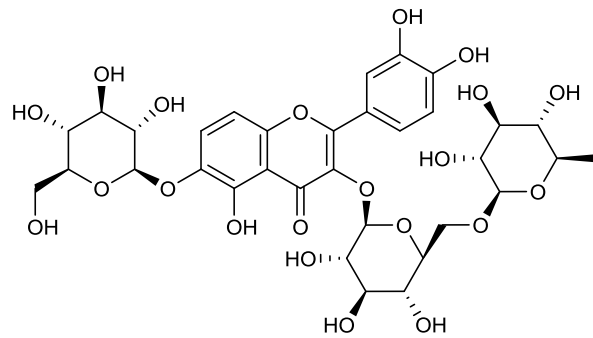

12. 66. Quercetin-3-O-rutinoside-7-O-glucoside

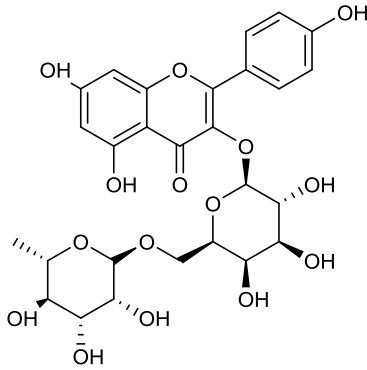

13. Kaempferol-3-O-robinobioside

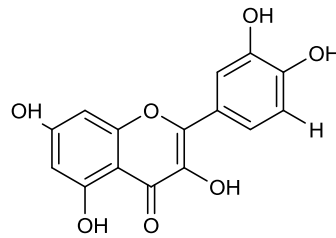

14. Quercetin

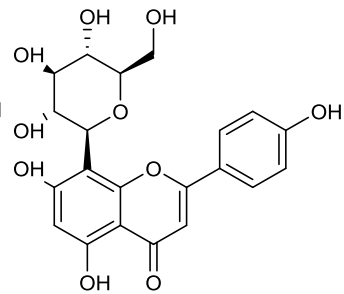

15. Vitexin

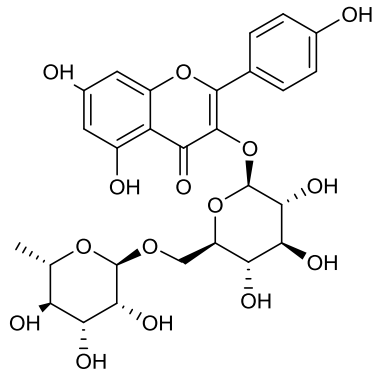

16. 53. 70. Kaempferol-3-O-rutinoside

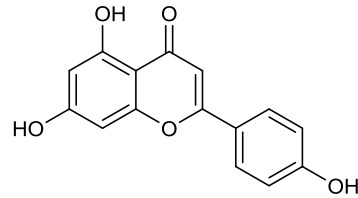

17. Apigenin

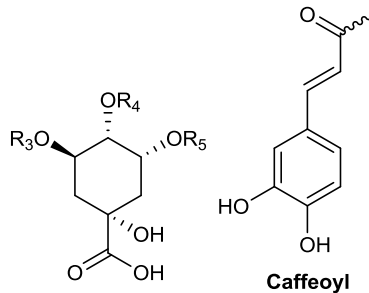

Caffeoyl

22.(43). 23. 24. 31. 32. 33.

|           | R5       | R4       | R3       |
|-----------|----------|----------|----------|
| 3-CQA     | H        | H        | Caffeoyl |
| 5-CQA     | Caffeoyl | H        | H        |
| 4-CQA     | H        | Caffeoyl | H        |
| 3,4-diCQA | H        | Caffeoyl | Caffeoyl |
| 3,5-diCQA | Caffeoyl | H        | Caffeoyl |
| 4,5-diCQA | Caffeoyl | Caffeoyl | H        |

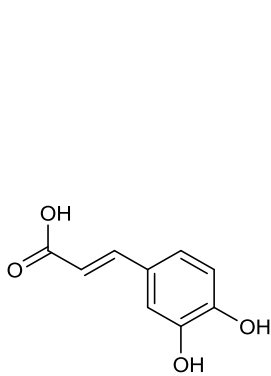

25. Caffeic acid

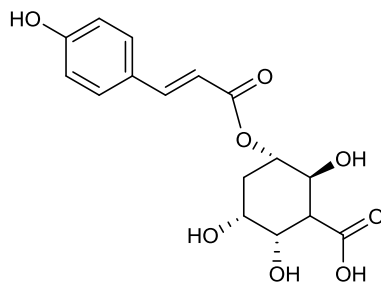

26. 4-O-p-coumaroylquinic acid

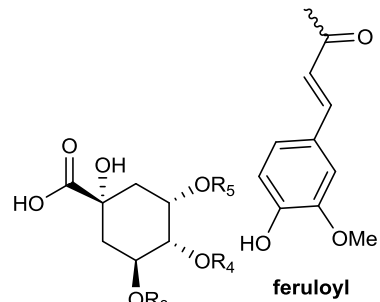

feruloyl

27. 28.

|       | R3       | R4 | R5       |
|-------|----------|----|----------|
| 3-FQA | feruloyl | H  | H        |
| 5-FQA | H        | H  | feruloyl |

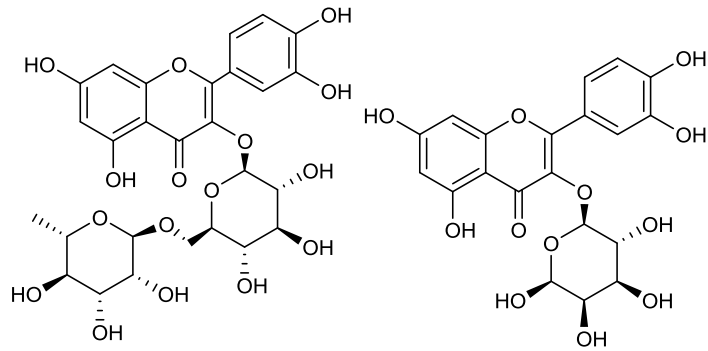

29. Rutin

30. 69. Quercetin-3-O-galactoside

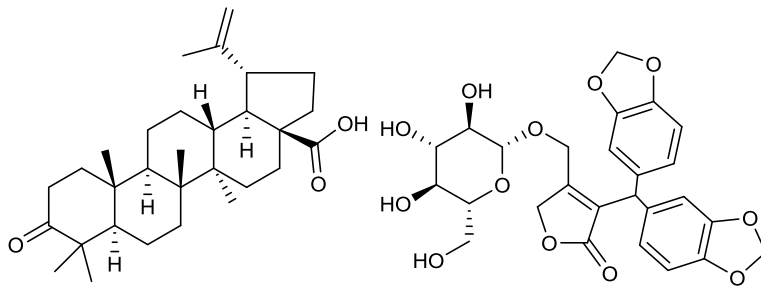

34. Betulonic acid

35. Macroanthoin G

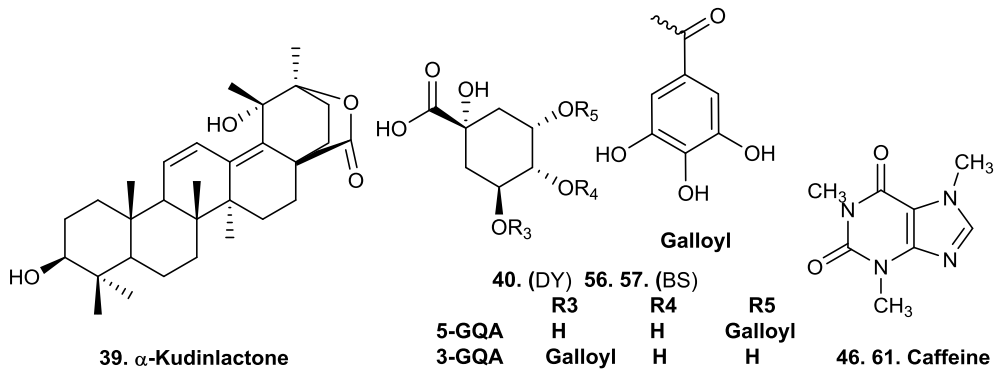

39.  $\alpha$ -Kudinlactone

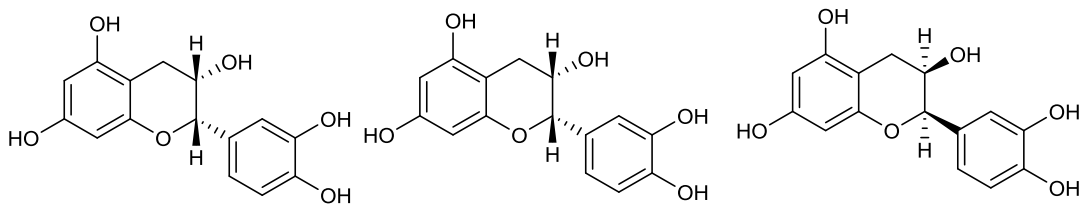

44. 59. (-)-Epigallocatechin (EGC)

45. 60. (+)-Catechin (C)

47. (-)-Epicatechin (EC)



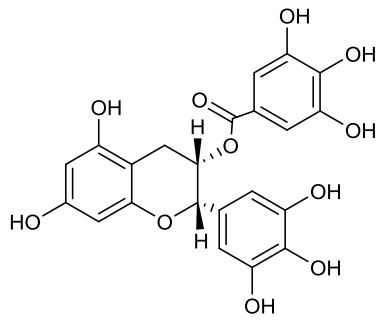

48. 62. (-)-Epigallocatechin-3-gallate (EGCG)

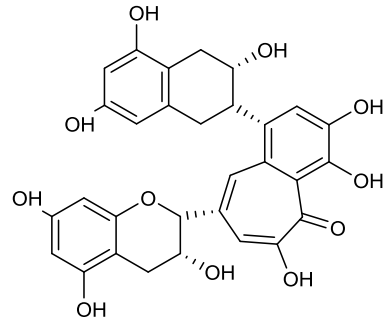

49. 64. Theaflavin

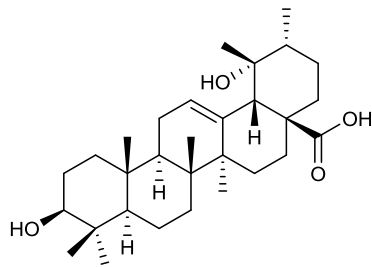

50. Pomolic acid

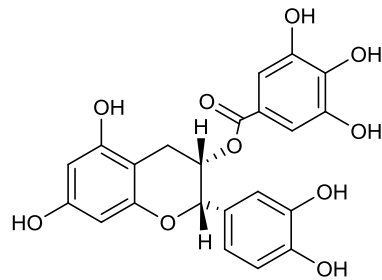

51. 67. (-)-Epicatechin-3-gallate (ECG)

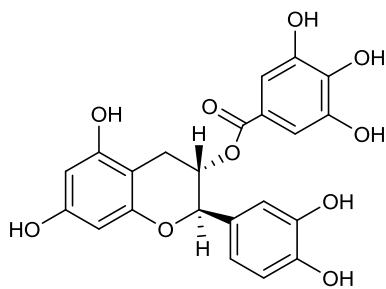

52. 68. (-)-Catechin-3-gallate (CG)

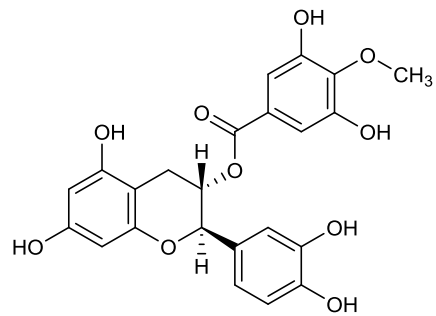

54. (-)-Catechin-3-O-(4-O-methyl) gallate

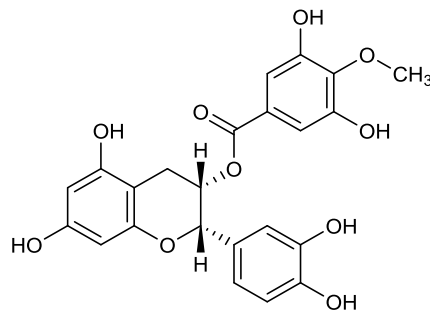

55. (-)-Epicatechin-3-O-(4-O-methyl) gallate

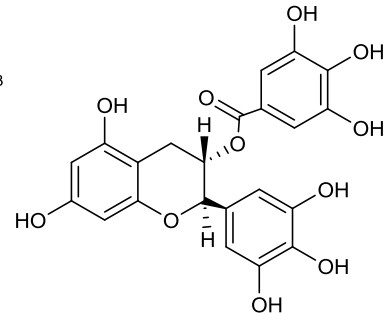

63. (-)-Gallocatechin-3-gallate (GCG)

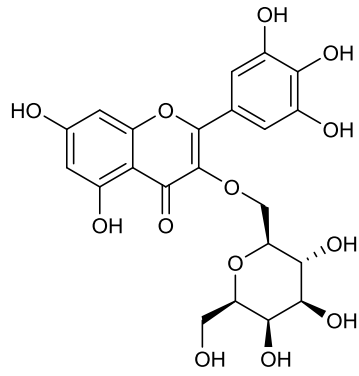

65. Myricetin 3-O- $\beta$ -L-galactopyranoside

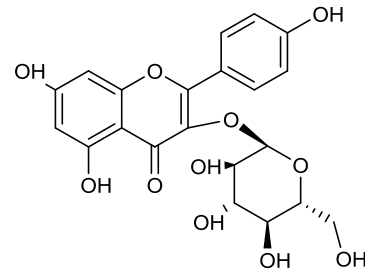

71. Kaempferol-3-O-glucoside

Figure S12. The structures of the main compound of four kinds of teas.
